# Supplementary material
Source: Springer Nature journal article supplement (https://www.springermedizin.de/resource/supplementary/13075_2010_9757_MOESM3_ESM.pdf/9693570)

■ IgG1 1 $\mu$ g + Pam 200ng/ml

▨ OPN301 1 $\mu$ g + Pam 200ng/ml

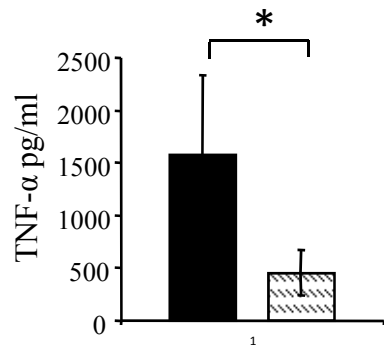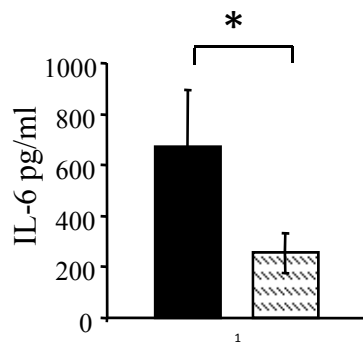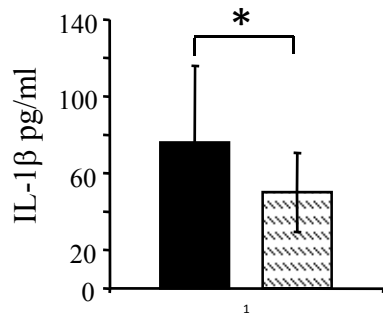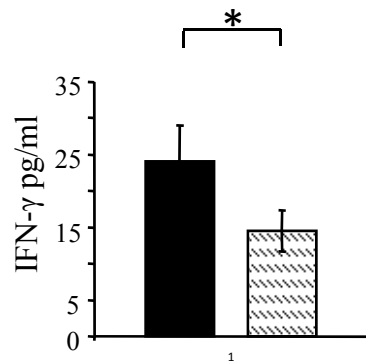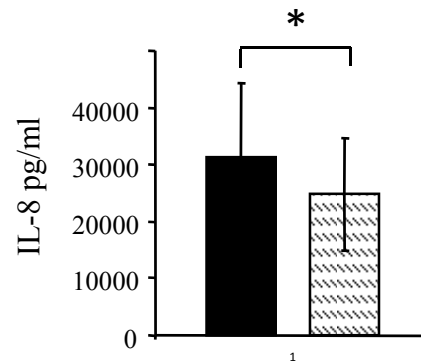

Supplement: MOESM3 [file 9693570]
